# Supplementary material for: Wasted rose-derived porous carbons with unique hierarchical heteroatom-enriched structures as a high-performance supercapacitor electrode
Source: Royal Society of Chemistry journal article supplement (doi:10.1039/d4ta03118k), 2024-01-01
Supplement: d4ta03118k1.pdf [file d4ta03118k1.pdf]

## Supplementary information

### The wasted Rose-derived Porous Carbon with a Unique Hierarchical Heteroatom-Enriched Structure as a High-Performance Supercapacitor Electrode

Amir Mahdi Homayounfard <sup>a</sup>, Mahdi Maleki <sup>a1\*</sup>, Hosein Banna Motejadded Emrooz <sup>b2\*</sup>,  
Hajar Ghanbari <sup>a</sup>, Samira Mohammadi <sup>c</sup>, Ahmad Shokrieh <sup>d</sup>

<sup>a</sup> School of Metallurgy & Materials Engineering, Iran University of Science and Technology (IUST), Narmak, Tehran 16846, Iran.

<sup>b</sup> School of New Technologies, Iran University of Science and Technology (IUST), Narmak, Tehran 16846, Iran.

<sup>c</sup> Department of Chemistry, Iran University of Science and Technology (IUST), Narmak, Tehran, Iran.

<sup>d</sup> CAS Key Laboratory of Nanosystem and Hierarchical Fabrication, c, Beijing 100190, P. R. China.

---

<sup>1</sup> \* Corresponding authors:

Mahdi Maleki: [malekim@iust.ac.ir](mailto:malekim@iust.ac.ir), Tel.: +982177459151; Fax: +982177240480

<sup>2</sup> \* Corresponding authors:

Hosein Banna Motejadded Emrooz: [Motejadded@iust.ac.ir](mailto:Motejadded@iust.ac.ir), Tel.: +982173228836; Fax: +982177240480

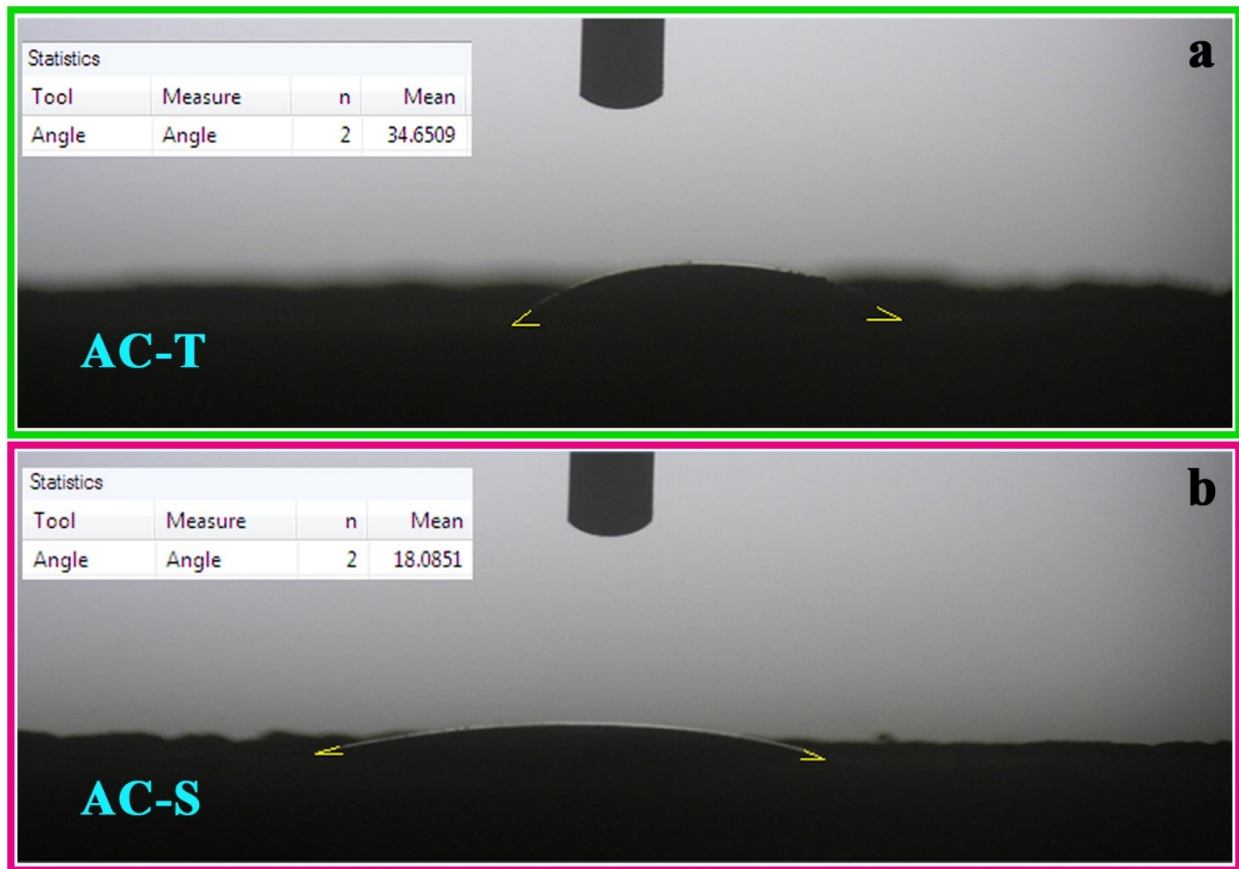

Fig S1. Water drop contact angle test on (a) AC-T and (b) AC-S sample.

**Table S1** chemical composition and the fraction of different type of nitrogen in AC-T and AC-S.

| Sam<br>ple | Chemical composition (at.<br>%) |          |          |          |      | Fraction of different type of nitrogen (%) |              |               |                |           |                       |
|------------|---------------------------------|----------|----------|----------|------|--------------------------------------------|--------------|---------------|----------------|-----------|-----------------------|
|            | C                               | O        | N        | S        | P    | Pyridinic                                  | Pyrr<br>olic | Graph<br>itic | Quatern<br>ary | Oxi<br>de | Pyridi<br>ne<br>oxide |
| AC-<br>S   | 89.<br>70                       | 8.4<br>4 | 1.7<br>2 | 0.1<br>3 | –    | 16.52                                      | 60.28        | 16.86         | –              | 6.34      | –                     |
| AC-<br>T   | 90.<br>98                       | 6.0<br>4 | 1.7<br>5 | 0.1<br>2 | 1.11 | 32.74                                      | 40.27        | –             | 26.23          | –         | 0.76                  |

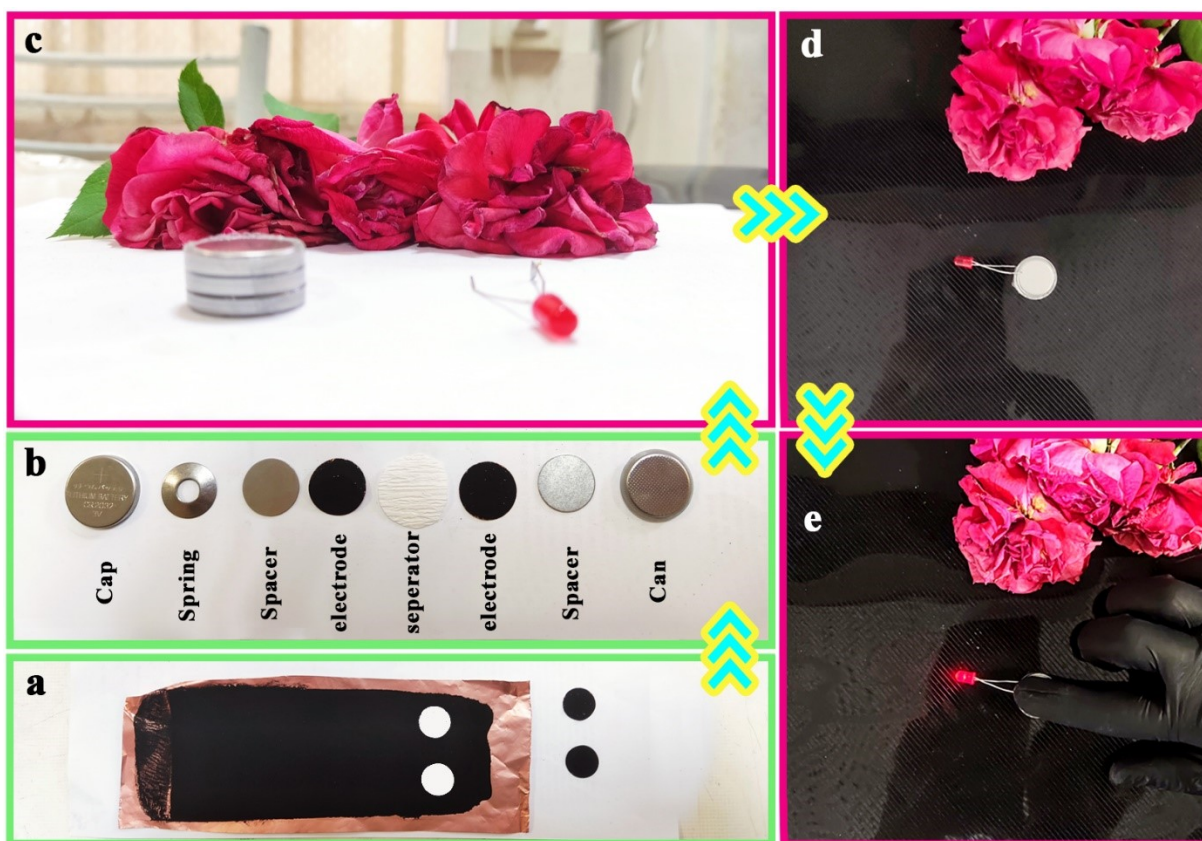

**Fig S2.** (a) coated material on Cu foil, (b) coin cell configuration of symmetric supercapacitor device, (c) series of three coin cells with 6 M KOH electrolyte and a red light-emitting diode (LED), (d) the LED light before connection, and (e) glowing LED connected to three devices in series.

For validation the practical performance of the proposed AC, further investigation carried out by fabricating symmetric coin cell supercapacitor utilizing AC-S as the electrode and 6 M KOH as the electrolyte. AC-S as the active material was mixed with carbon black and polyvinylidene difluoride (PVDF) by a mass ratio of 80:10:10. The mixture dispersed homogeneously in N-Methyl-2-pyrrolidone (NMP) solvent. The obtained slurry was coated on copper foil using doctor blade carefully to fabricate an electrode with a uniform surface and good connection between the material and the substrate (Fig S2a). About 2 mg of the AC-S was loaded on the foil for each of the electrodes. At the next step, coin cells were made using the configuration exhibited in Fig. S2b. Three coin cells were put in series, as shown in Fig. S2c, to supply enough potential to turn on the light-emitting diode (LED). After the charging process, the series coin cells

connected to LED. It could successfully supply the required energy to turn on the LED (**Fig. S2d** and **Fig. S2e**, demonstrate the situation of LED before and after the electrical connection, respectively). Further, the video (S2) demonstrates the performance of the series coin cells.
